# Supplementary material for: The South African estuarine specialistCodium tenue(Bryopsidales, Chlorophyta) discovered in a south-western Australian estuary
Source: publisher site journal article supplement (doi:10.1515/bot-2015-0058), 2015-11-05
Supplement: Supplementary file 1 [file bot-2015-0058_suppl.zip]

**Supplemental material**

**The South African estuarine specialist *Codium tenue* (Bryopsidales, Chlorophyta) discovered in a south-western Australian estuary**

John M. Huisman, Rainbo R. M. Dixon, Felicity N. Hart, Heroen Verbruggen and Robert J. Anderson

DOI: 10.1515/bot-2015-0058

**Supplemental Figure 1:**  Phylogenetic hypothesis of *Codium* species inferred from the rbcL alignment of *Codium* sequences using Bayesian analysis. Posterior probability branch values <0.70 are removed. Scale bar indicates the number of substitutions per site.
